# Supplementary material
Source: publisher site journal article supplement (https://www.dovepress.com/get_supplementary_file.php?f=480925.docx)
Supplement: Supplementary file 1 [file get_supplementary_file.php]

Table S1 Characteristics of the study populations

| Characteristics | Total(n=22,689) | Non-OA(n=21,612) | OA(n=1,077) | *P* value |
| --- | --- | --- | --- | --- |
| Age(years) | 42.94(0.20) | 42.15(0.20) | 59.54(0.53) | < 0.0001 |
| MET(n) | 3422.28(67.93) | 3503.33(70.03) | 1724.26(116.85) | < 0.0001 |
| WBC(×109/L) | 7.16(0.02) | 7.16(0.03) | 7.17(0.08) | 0.86 |
| LYM(×109/L) | 2.14(0.01) | 2.14(0.01) | 2.09(0.05) | 0.33 |
| NEU(×109/L) | 4.22(0.02) | 4.21(0.02) | 4.25(0.05) | 0.46 |
| EOS(×109/L) | 0.20(0.00) | 0.20(0.00) | 0.22(0.01) | 0.001 |
| PLT(×109/L) | 254.07(0.74) | 253.38(0.74) | 268.51(2.70) | < 0.0001 |
| ALB(g/dl) | 4.34(0.00) | 4.34(0.00) | 4.24(0.01) | < 0.0001 |
| NLR(%) | 2.14(0.01) | 2.13(0.01) | 2.33(0.04) | < 0.0001 |
| NPAR(%) | 13.46(0.03) | 13.44(0.03) | 13.99(0.08) | < 0.0001 |
| ELR(%) | 0.10(0.00) | 0.10(0.00) | 0.11(0.00) | < 0.0001 |
| **NLRQ(%)** |  |  |  | < 0.001 |
| Q1 | 31.39(0.01) | 31.66(0.49) | 25.73(1.46) |  |
| Q2 | 34.28(0.01) | 34.30(0.41) | 33.79(1.67) |  |
| Q3 | 34.33(0.01) | 34.04(0.51) | 40.48(1.88) |  |
| **NPARQ(%)** |  |  |  | < 0.0001 |
| Q1 | 32.65(0.01) | 33.01(0.51) | 25.22(1.47) |  |
| Q2 | 34.56(0.01) | 34.59(0.46) | 33.89(1.78) |  |
| Q3 | 32.79(0.01) | 32.40(0.56) | 40.89(2.00) |  |
| **ELRQ(%)** |  |  |  | < 0.0001 |
| Q1 | 32.47(0.01) | 32.82(0.46) | 25.08(1.67) |  |
| Q2 | 33.29(0.01) | 33.37(0.39) | 31.66(1.57) |  |
| Q3 | 34.24(0.01) | 33.81(0.47) | 43.26(1.70) |  |
| **Sex(%)** |  |  |  | < 0.0001 |
| Female | 46.16(0.01) | 45.37(0.37) | 62.75(1.71) |  |
| Male | 53.84(0.01) | 54.63(0.37) | 37.25(1.71) |  |
| **Race(%)** |  |  |  | < 0.0001 |
| White | 71.41(0.02) | 70.62(1.01) | 87.83(1.35) |
| Black | 9.29(0.00) | 9.53(0.52) | 4.19(0.61) |
| Mexican American | 7.76(0.00) | 8.05(0.54) | 1.70(0.26) |
| Other | 11.55(0.00) | 11.80(0.52) | 6.28(0.95) |
| **Education Level(%)** |  |  |  |  |
| College graduate or above | 32.83(0.01) | 32.96(0.87) | 29.98(1.64) | 0.2 |
| Some college or AA degree | 32.04(0.01) | 32.09(0.52) | 31.04(1.75) |  |
| High school graduate or equivalent | 22.81(0.01) | 22.69(0.52) | 25.25(1.52) |  |
| 9-11th grade | 8.76(0.00) | 8.70(0.34) | 10.00(1.08) |  |
| Less than 9th grade | 3.57(0.00) | 3.56(0.17) | 3.73(0.68) |  |
| **Poverty Income Ratio(%)** |  |  |  |  |
| >3.5 | 47.38(0.01) | 47.23(0.86) | 50.37(2.40) | 0.005 |
| 1.3-3.5 | 34.61(0.01) | 34.52(0.61) | 36.48(1.91) |
| ≤1.3 | 18.02(0.01) | 18.25(0.54) | 13.16(1.26) |
| **Hypertension(%)** |  |  |  |
| No | 70.89(0.02) | 72.28(0.46) | 41.80(1.98) | < 0.0001 |
| Yes | 29.11(0.01) | 27.72(0.46) | 58.20(1.98) |  |
| **Diabetes Mellitus(%)** |  |  |  |  |
| DM | 8.28(0.00) | 7.98(0.22) | 14.58(1.24) | < 0.0001 |
| IFG | 3.79(0.00) | 3.75(0.18) | 4.59(0.64) |  |
| IGT | 2.21(0.00) | 2.16(0.13) | 3.28(0.75) |  |
| No | 85.72(0.02) | 86.11(0.31) | 77.55(1.60) |  |
| **BMI Category(%)** |  |  |  |  |
| Underweight | 5.14(0.00) | 5.27(0.21) | 2.37(0.54) | < 0.0001 |
| Normal | 29.04(0.01) | 29.38(0.53) | 22.00(1.60) |
| Overweight | 34.10(0.01) | 34.05(0.45) | 35.03(1.47) |
| Obese | 31.72(0.01) | 31.29(0.50) | 40.59(1.62) |
| **Smoking Status(%)** |  |  |  |
| Former | 23.06(0.01) | 22.30(0.49) | 38.85(1.73) | < 0.0001 |
| Now | 21.05(0.01) | 21.34(0.47) | 15.11(1.48) |  |
| Never | 55.89(0.01) | 56.36(0.61) | 46.03(1.76) |  |
| **Drinking Status(%)** |  |  |  |  |
| Mild | 36.80(0.01) | 36.40(0.63) | 45.24(1.80) | < 0.0001 |
| Heavy | 23.89(0.01) | 24.61(0.54) | 8.74(1.05) |
| Former | 11.17(0.00) | 10.76(0.35) | 19.75(1.38) |
| Moderate | 18.55(0.01) | 18.75(0.38) | 14.47(1.40) |
| Never | 9.59(0.01) | 9.48(0.57) | 11.80(1.49) |
| **Survival Status(%)** |  |  |  |
| 0 | 92.84(0.02) | 93.93(0.20) | 70.11(1.55) | < 0.0001 |
| 1 | 7.16(0.00) | 6.07(0.20) | 29.89(1.55) |  |

Mean ± SEM for continuous variables: P-value was calculated by weighted linear regression. % for categorical variables: P-value was calculated by weighted chi-square test. MET, Metabolic Equivalent.
